# Supplementary material for: Risk Assessment After a Severe Hospital-Acquired Infection Associated With Carbapenemase-Producing Pseudomonas aeruginosa
Source: PubMed Central journal article supplement (PMC6484879; doi:10.1001/jamanetworkopen.2018.7665), 2019-02-15
Supplement: jamanetwopen-2-e187665-s001.pdf [file jamanetwopen-2-e187665-s001.pdf]

## Supplementary Online Content

Hopman J, Meijer C, Kenters N, et al. Risk assessment after a severe hospital-acquired infection associated with carbapenemase-producing *Pseudomonas aeruginosa*. *JAMA Netw Open*. 2019;2(2):e187665.

doi:10.1001/jamanetworkopen.2018.7665

**eTable.** Overview of Environmental Sampling

This supplementary material has been provided by the authors to give readers additional information about their work.

**eTable.** Overview of Environmental Sampling

| Room nr. | Environmental sample | Shower drain                                          | Air sample t=0 min | Air sample t=15 min                                   |
|----------|----------------------|-------------------------------------------------------|--------------------|-------------------------------------------------------|
| 50       | 31-1-2018            | N/A                                                   | N/A                | N/A                                                   |
|          | 5-2-2018             | Other gram-negative bacilli (GNB)                     | N/A                | N/A                                                   |
|          | 12-2-2018            | N/A                                                   | N/A                | N/A                                                   |
|          | 16-2-2018            | <b><i>Pseudomonas aeruginosa</i></b><br>VIM Other GNB | NG                 | NG                                                    |
|          | 23-2-2018            | <b><i>Pseudomonas aeruginosa</i></b><br>VIM Other GNB | NG                 | Other GNB                                             |
| 51       | 31-1-2018            | N/A                                                   | N/A                | N/A                                                   |
|          | 5-2-2018             | <b><i>Pseudomonas aeruginosa</i></b><br>VIM Other GNB | N/A                | N/A                                                   |
|          | 12-2-2018            | <b><i>Pseudomonas aeruginosa</i></b><br>VIM           | Other GNB          | Other GNB                                             |
|          | 16-2-2018            | Other GNB                                             | NG                 | NG                                                    |
|          | 23-2-2018            | Other GNB                                             | NG                 | NG                                                    |
| 52       | 31-1-2018            | N/A                                                   | N/A                | N/A                                                   |
|          | 5-2-2018             | Other GNB                                             | N/A                | N/A                                                   |
|          | 12-2-2018            | Other GNB                                             | Other GNB          | <b><i>Pseudomonas aeruginosa</i></b><br>VIM Other GNB |
|          | 16-2-2018            | <b><i>Pseudomonas aeruginosa</i></b><br>VIM Other GNB | Other GNB          | NG                                                    |
|          | 23-2-2018            | <b><i>Pseudomonas aeruginosa</i></b><br>VIM           | NG                 | NG                                                    |
| 53       | 31-1-2018            | N/A                                                   | N/A                | N/A                                                   |
|          | 5-2-2018             | Other GNB                                             | N/A                | N/A                                                   |
|          | 12-2-2018            | N/A                                                   | N/A                | N/A                                                   |
|          | 16-2-2018            | <b><i>Pseudomonas aeruginosa</i></b><br>VIM Other GNB | Other GNB          | NG                                                    |
|          | 23-2-2018            | <b><i>Pseudomonas aeruginosa</i></b><br>VIM Other GNB | NG                 | NG                                                    |
| 54       | 31-1-2018            | Other GNB                                             | N/A                | N/A                                                   |
|          | 5-2-2018             | Other GNB                                             | N/A                | N/A                                                   |
|          | 12-2-2018            | N/A                                                   | N/A                | N/A                                                   |
|          | 16-2-2018            | <b><i>Pseudomonas aeruginosa</i></b><br>VIM Other GNB | NG                 | NG                                                    |

|    |           |                                                       |           |           |
|----|-----------|-------------------------------------------------------|-----------|-----------|
|    | 23-2-2018 | <b><i>Pseudomonas aeruginosa</i></b><br>VIM Other GNB | NG        | NG        |
| 55 | 31-1-2018 | N/A                                                   | N/A       | N/A       |
|    | 5-2-2018  | Other GNB                                             | N/A       | N/A       |
|    | 12-2-2018 | N/A                                                   | N/A       | N/A       |
|    | 16-2-2018 | <b><i>Pseudomonas aeruginosa</i></b><br>VIM Other GNB | NG        | Other GNB |
|    | 23-2-2018 | Other GNR                                             | NG        | NG        |
| 56 | 31-1-2018 | <b><i>Pseudomonas aeruginosa</i></b><br>VIM Other GNB | N/A       | N/A       |
|    | 5-2-2018  | <b><i>Pseudomonas aeruginosa</i></b><br>VIM Other GNB | N/A       | N/A       |
|    | 12-2-2018 | <b><i>Pseudomonas aeruginosa</i></b><br>VIM           | NG        | NG        |
|    | 16-2-2018 | <b><i>Pseudomonas aeruginosa</i></b><br>VIM Other GNB | NG        | Other GNB |
|    | 23-2-2018 | Other GNB                                             | NG        | Other GNB |
| 57 | 31-1-2018 | N/A                                                   | N/A       | N/A       |
|    | 5-2-2018  | <b><i>Pseudomonas aeruginosa</i></b><br>VIM           | N/A       | N/A       |
|    | 12-2-2018 | <b><i>Pseudomonas aeruginosa</i></b><br>VIM Other GNB | NG        | NG        |
|    | 16-2-2018 | <b><i>Pseudomonas aeruginosa</i></b><br>VIM Other GNB | NG        | NG        |
|    | 23-2-2018 | Other GNB                                             | NG        | Other GNB |
| 58 | 31-1-2018 | N/A                                                   | N/A       | N/A       |
|    | 5-2-2018  | Other GNB                                             | N/A       | N/A       |
|    | 12-2-2018 | N/A                                                   | N/A       | N/A       |
|    | 16-2-2018 | Other GNB                                             | NG        | NG        |
|    | 23-2-2018 | Other GNB                                             | Other GNB | Other GNB |
| 59 | 31-1-2018 | N/A                                                   | N/A       | N/A       |
|    | 5-2-2018  | Other GNB                                             | N/A       | N/A       |
|    | 12-2-2018 | N/A                                                   | N/A       | N/A       |
|    | 16-2-2018 | Other GNB                                             | Other GNB | NG        |
|    | 23-2-2018 | Other GNB                                             | NG        | NG        |
| 60 | 31-1-2018 | N/A                                                   | N/A       | N/A       |
|    | 5-2-2018  | Other GNB                                             | N/A       | N/A       |

|                                               |           |           |     |     |
|-----------------------------------------------|-----------|-----------|-----|-----|
|                                               | 12-2-2018 | N/A       | N/A | N/A |
|                                               | 16-2-2018 | Other GNB | NG  | NG  |
|                                               | 23-2-2018 | Other GNB | NG  | NG  |
| *after cleaning and disinfection intervention |           |           |     |     |
